# Supplementary material
Source: PubMed Central journal article supplement (PMC8206396)
Supplement: mmc1.pdf [file mmc1.pdf]

**Supplemental information**

**A computational approach for detecting  
physiological homogeneity  
in the midst of genetic heterogeneity**

**Peng Zhang, Aurélie Cobat, Yoon-Seung Lee, Yiming Wu, Cigdem Sevim Bayrak, Clémentine Boccon-Gibod, Daniela Matuozzo, Lázaro Lorenzo, Aayushee Jain, Soraya Boucherit, Louis Vallée, Burkhard Stüve, Stéphane Chabrier, Jean-Laurent Casanova, Laurent Abel, Shen-Ying Zhang, and Yuval Itan**

## Supplemental Figures

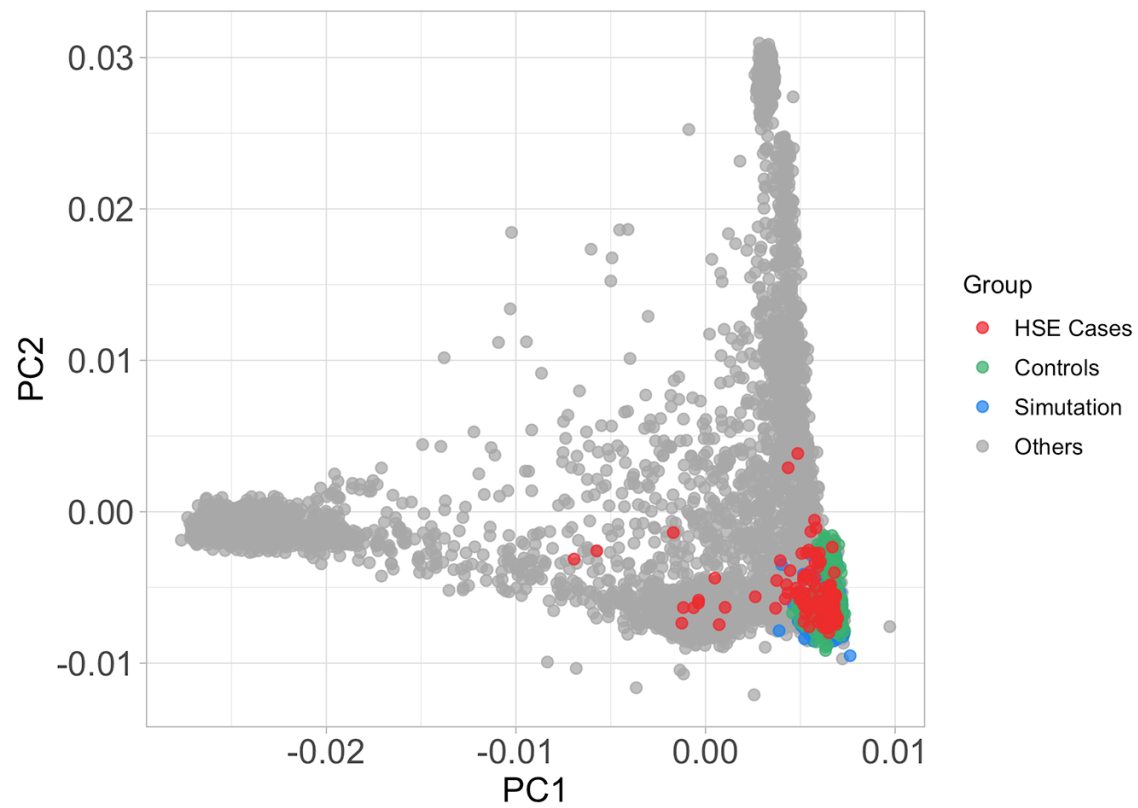

**Figure S1. PCA plot of the European individuals studied here.** HSE cases: 122 individuals, Controls: 490 individuals, Simulations: 893 individuals, and the other 7,958 individuals in our in-house HGID database.

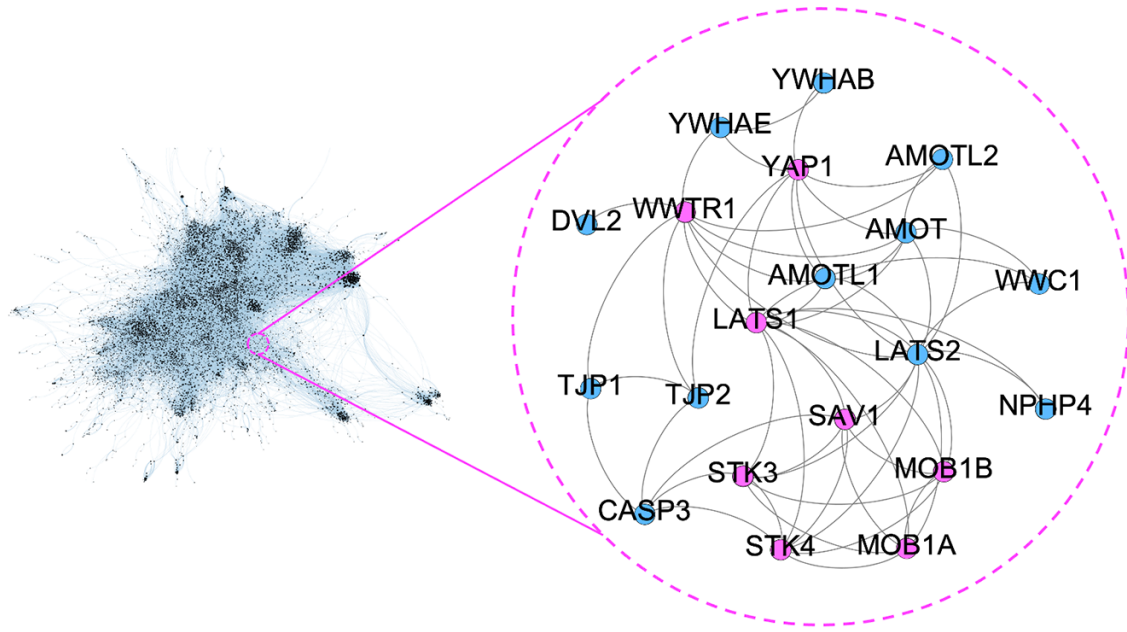

**Figure S2. The PPI network of 20 Hippo pathway genes in the background biological interaction network.** The eight genes selected for the simulation study are shown in pink. The REACTOME Hippo signaling pathway is accessible via <https://reactome.org/content/detail/R-HSA-2028269>.

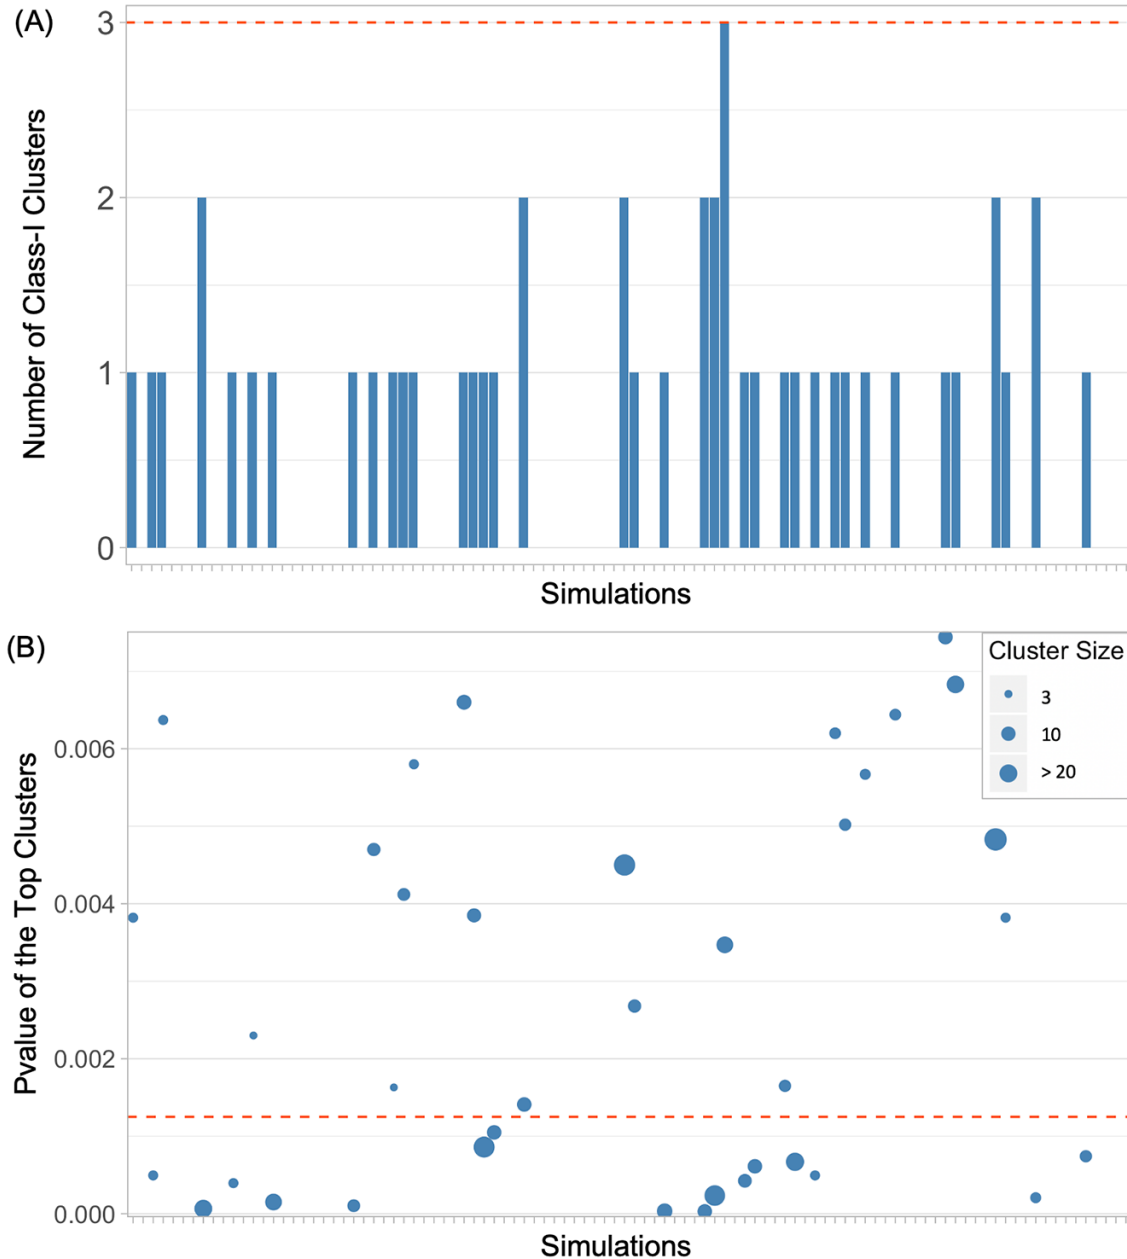

**Figure S3. Simulation study for the null hypothesis test.** We performed 100 simulations of the NHC method on the randomly sampled 100 individuals with different severe infectious diseases. (A) The number of significant class-I gene clusters obtained in each simulation, where the red line indicates the three class-I gene clusters generated in the HSE study. (B) Cluster-level  $p$ -value of the top-ranked gene cluster in each simulation, in which the node size represents the number of genes in each top-ranked cluster, and the red line is the  $p$ -value ( $=0.00125$ ) of the top-ranked cluster in the HSE study (the HSE study is presented later in the results section.)

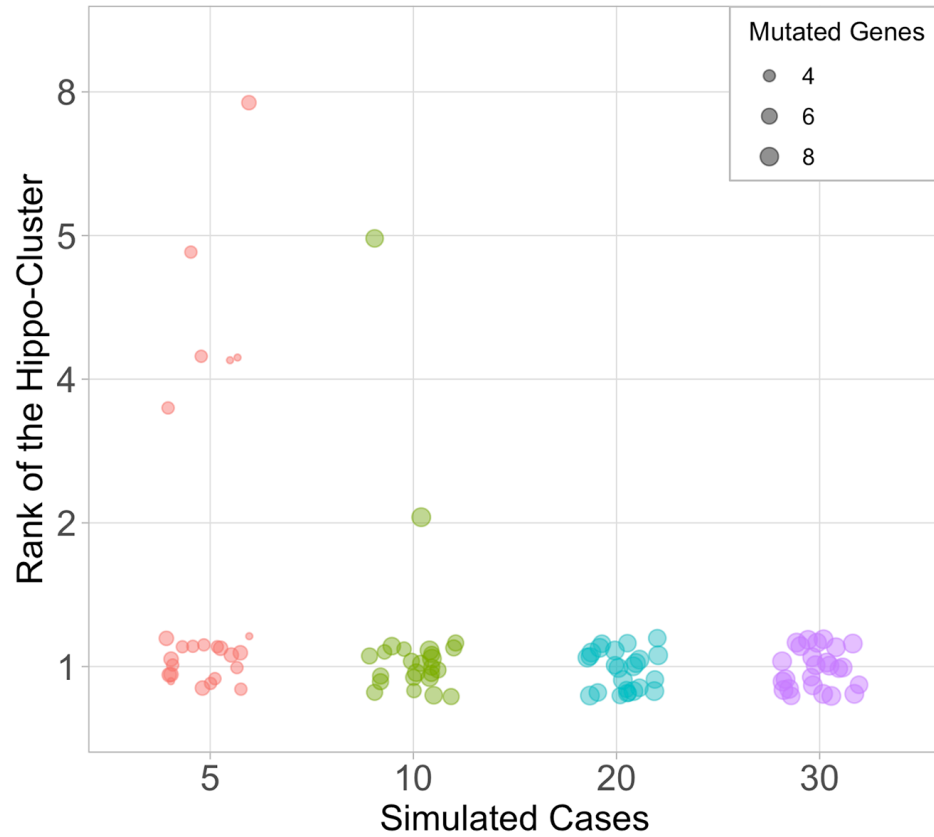

**Figure S4. Simulation study for detecting the simulated disease signal in the Hippo pathway.** Rank of the gene clusters that are most enriched in the Hippo pathway (Hippo-Cluster), in 100 simulations of 100 random cases with a random subgroup of 5, 10, 20, or 30 cases (25 simulations per subgroup size) being randomly given any of the eight simulated mutations of genes from the Hippo pathway.

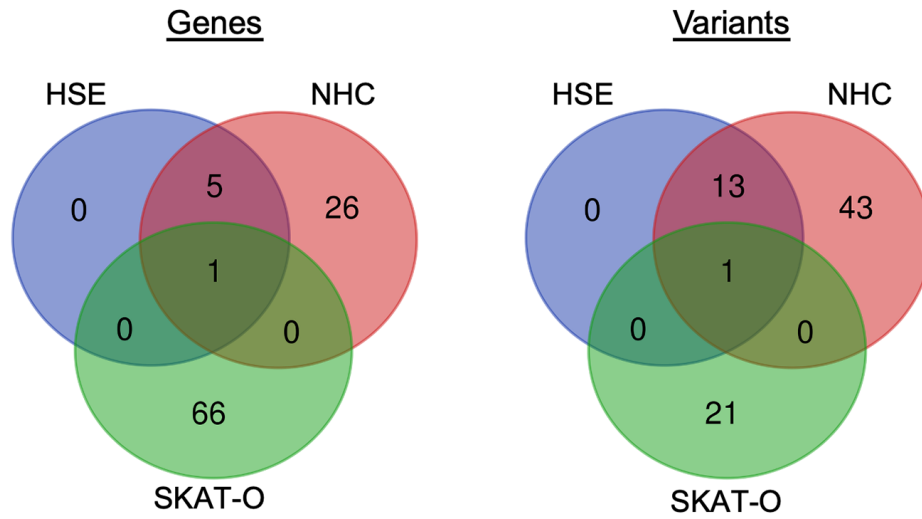

**Figure S5. The genes/variants overlapping between different results.** The known HSE-causing variants and their genes, the genes/variants identified in the NHC top-ranked gene cluster, and the genes/variants significantly enriched in the SKAT-O test.

## Supplemental Tables

| #  | Control-Embedded Pathways                                                 | Occurrence |
|----|---------------------------------------------------------------------------|------------|
| 1  | REACTOME_SIGNALING_BY_RECEPTOR_TYROSINE_KINASES                           | 77         |
| 2  | REACTOME_RRNA_PROCESSING                                                  | 72         |
| 3  | REACTOME_CHROMATIN_MODIFYING_ENZYMES                                      | 66         |
| 4  | REACTOME_MITOCHONDRIAL_TRANSLATION                                        | 61         |
| 5  | REACTOME_CELL_CYCLE                                                       | 58         |
| 6  | REACTOME_DNA_REPAIR                                                       | 57         |
| 7  | REACTOME_MRNA_SPLICING                                                    | 51         |
| 8  | KEGG_CELL_CYCLE                                                           | 49         |
| 9  | REACTOME_TRANSCRIPTIONAL_REGULATION_OF_WHITE_ADIPOCYTE_DIFFERENTIATION    | 49         |
| 10 | REACTOME_METABOLISM_OF_RNA                                                | 44         |
| 11 | KEGG_PATHWAYS_IN_CANCER                                                   | 41         |
| 12 | REACTOME_CELL_CYCLE_MITOTIC                                               | 39         |
| 13 | REACTOME_RESPIRATORY_ELECTRON_TRANSPORT                                   | 38         |
| 14 | REACTOME_FORMATION_OF_RNA_POL_II_ELONGATION_COMPLEX                       | 33         |
| 15 | KEGG_FOCAL_ADHESION                                                       | 32         |
| 16 | REACTOME_REGULATION_OF_LIPID_METABOLISM_BY_PPARALPHA                      | 23         |
| 17 | REACTOME_CELL_CYCLE_CHECKPOINTS                                           | 22         |
| 18 | REACTOME_PROCESSING_OF_CAPPED_INTRON_CONTAINING_PRE_MRNA                  | 22         |
| 19 | REACTOME_CROSS_PRESENTATION_OF_SOLUBLE_EXOGENOUS_ANTIGENS_ENDOSOMES       | 21         |
| 20 | REACTOME_RNA_POLYMERASE_II_TRANSCRIPTION                                  | 21         |
| 21 | REACTOME_TRANSCRIPTION_OF_THE_HIV_GENOME                                  | 20         |
| 22 | REACTOME_RNA_POLYMERASE_II_TRANSCRIBES_SNRNA_GENES                        | 18         |
| 23 | REACTOME_TRANSCRIPTIONAL_REGULATION_BY_TP53                               | 18         |
| 24 | REACTOME_EUKARYOTIC_TRANSLATION_INITIATION                                | 16         |
| 25 | REACTOME_HATS_ACETYLATE_HISTONES                                          | 15         |
| 26 | KEGG_APOPTOSIS                                                            | 14         |
| 27 | REACTOME_NEDDYLATION                                                      | 14         |
| 28 | REACTOME_INTRACELLULAR_SIGNALING_BY_SECOND_MESSENGERS                     | 13         |
| 29 | KEGG_PROTEASOME                                                           | 12         |
| 30 | REACTOME_CLATHRIN_MEDIATED_ENDOCYTOSIS                                    | 12         |
| 31 | REACTOME_HIV_TRANSCRIPTION_INITIATION                                     | 12         |
| 32 | REACTOME_EPIGENETIC_REGULATION_OF_GENE_EXPRESSION                         | 11         |
| 33 | REACTOME_DNA_REPLICATION                                                  | 10         |
| 34 | REACTOME_G2_M_CHECKPOINTS                                                 | 10         |
| 35 | REACTOME_M_PHASE                                                          | 10         |
| 36 | KEGG_ENDOCYTOSIS                                                          | 9          |
| 37 | REACTOME_COOPERATION_OF_PDCL_PHLP1_AND_TRIC_CCT_IN_G_PROTEIN_BETA_FOLDING | 8          |
| 38 | REACTOME_COPI_INDEPENDENT_GOLGI_TO_ER_RETROGRADE_TRAFFIC                  | 8          |
| 39 | REACTOME_MITOTIC_G1_PHASE_AND_G1_S_TRANSITION                             | 8          |
| 40 | REACTOME_MITOTIC_SPINDLE_CHECKPOINT                                       | 8          |
| 41 | REACTOME_RRNA_MODIFICATION_IN_THE_NUCLEUS_AND_CYTOSOL                     | 8          |
| 42 | REACTOME_CELLULAR_RESPONSES_TO_EXTERNAL_STIMULI                           | 7          |
| 43 | REACTOME_SEPARATION_OF_SISTER_CHROMATIDS                                  | 7          |
| 44 | REACTOME_SIGNALING_BY_VEGF                                                | 7          |
| 45 | KEGG_ERBB_SIGNALING_PATHWAY                                               | 6          |
| 46 | REACTOME_CIRCADIAN_CLOCK                                                  | 6          |
| 47 | REACTOME_EUKARYOTIC_TRANSLATION_ELONGATION                                | 6          |
| 48 | REACTOME_INTRAFLAGELLAR_TRANSPORT                                         | 6          |
| 49 | KEGG_ENDOMETRIAL_CANCER                                                   | 5          |
| 50 | KEGG_MTOR_SIGNALING_PATHWAY                                               | 5          |
| 51 | KEGG_SNARE_INTERACTIONS_IN_VESICULAR_TRANSPORT                            | 5          |

|    |                                                            |   |
|----|------------------------------------------------------------|---|
| 52 | KEGG_SPLICEOSOME                                           | 5 |
| 53 | REACTOME_APC_C_MEDIATED_DEGRADATION_OF_CELL_CYCLE_PROTEINS | 5 |
| 54 | REACTOME_HIV_INFECTION                                     | 5 |
| 55 | REACTOME_MTOR_SIGNALLING                                   | 5 |
| 56 | REACTOME_PI3K_AKT_SIGNALING_IN_CANCER                      | 5 |
| 57 | REACTOME_PROCESSING_OF_INTRONLESS_PRE_MRNAS                | 5 |
| 58 | REACTOME_REGULATION_OF_TP53_ACTIVITY                       | 5 |

**Table S1:** Control-embedded pathways identified by running the NHC method on 100 randomly selected controls versus the remaining 390 controls, for 100 simulations.



| <b>Gene</b>  | <b>Chrom</b> | <b>Position</b> | <b>Ref Allele</b> | <b>Alt Allele</b> | <b>Consequence</b>     | <b>CADD</b> |
|--------------|--------------|-----------------|-------------------|-------------------|------------------------|-------------|
| <i>LATS1</i> | 6            | 150023233       | A                 | T                 | stop-gained (p.Tyr10*) | 35          |
| <i>MOB1A</i> | 2            | 74399864        | AG                | TC                | stop-gained (p.Ser10*) | 38          |
| <i>MOB1B</i> | 4            | 71816524        | G                 | T                 | stop-gained (p.Glu9*)  | 35          |
| <i>SAV1</i>  | 14           | 51134658        | C                 | A                 | stop-gained (p.Glu10*) | 37          |
| <i>STK3</i>  | 8            | 99895955        | GGT               | TTA               | stop-gained (p.Thr10*) | 22.8        |
| <i>STK4</i>  | 20           | 43595237        | CC                | TA                | stop-gained (p.Pro10*) | 36          |
| <i>WWTR1</i> | 3            | 149375064       | GAG               | TTA               | stop-gained (p.Leu10*) | 36          |
| <i>YAP1</i>  | 11           | 101981607       | C                 | T                 | stop-gained (p.Gln10*) | 29.4        |

**Table S2.** The artificially created stop-gained mutations of eight genes from the Hippo pathway.

| Simulation | # Total Clusters | # Class-I Clusters<br>( $p$ -value $\leq 0.01$ ) | Top Gene Cluster |         |         |
|------------|------------------|--------------------------------------------------|------------------|---------|---------|
|            |                  |                                                  | $p$ -value       | # Genes | # Cases |
| simul 1    | 107              | 1                                                | 3.82E-03         | 4       | 7       |
| simul 2    | 109              | 1                                                | 2.30E-03         | 3       | 8       |
| simul 3    | 104              | 0                                                | NA               | NA      | NA      |
| simul 4    | 106              | 1                                                | 3.85E-03         | 11      | 21      |
| simul 5    | 111              | 0                                                | NA               | NA      | NA      |
| simul 6    | 102              | 0                                                | NA               | NA      | NA      |
| simul 7    | 96               | 0                                                | NA               | NA      | NA      |
| simul 8    | 90               | 0                                                | NA               | NA      | NA      |
| simul 9    | 99               | 0                                                | NA               | NA      | NA      |
| simul 10   | 105              | 0                                                | NA               | NA      | NA      |
| simul 11   | 113              | 1                                                | 6.37E-03         | 4       | 10      |
| simul 12   | 99               | 0                                                | NA               | NA      | NA      |
| simul 13   | 111              | 0                                                | NA               | NA      | NA      |
| simul 14   | 100              | 0                                                | NA               | NA      | NA      |
| simul 15   | 108              | 2                                                | 6.55E-05         | 23      | 39      |
| simul 16   | 110              | 0                                                | NA               | NA      | NA      |
| simul 17   | 110              | 0                                                | NA               | NA      | NA      |
| simul 18   | 109              | 1                                                | 3.95E-04         | 4       | 11      |
| simul 19   | 105              | 0                                                | NA               | NA      | NA      |
| simul 20   | 103              | 0                                                | NA               | NA      | NA      |
| simul 21   | 97               | 1                                                | 1.51E-04         | 19      | 37      |
| simul 22   | 108              | 0                                                | NA               | NA      | NA      |
| simul 23   | 107              | 0                                                | NA               | NA      | NA      |
| simul 24   | 107              | 0                                                | NA               | NA      | NA      |
| simul 25   | 111              | 0                                                | NA               | NA      | NA      |
| simul 26   | 127              | 0                                                | NA               | NA      | NA      |
| simul 27   | 111              | 0                                                | NA               | NA      | NA      |
| simul 28   | 119              | 0                                                | NA               | NA      | NA      |
| simul 29   | 103              | 1                                                | 1.04E-04         | 8       | 16      |
| simul 30   | 110              | 1                                                | 4.70E-03         | 9       | 16      |
| simul 31   | 105              | 0                                                | NA               | NA      | NA      |
| simul 32   | 104              | 1                                                | 1.63E-03         | 3       | 10      |
| simul 33   | 119              | 1                                                | 4.12E-03         | 8       | 15      |
| simul 34   | 105              | 1                                                | 5.80E-03         | 4       | 11      |
| simul 35   | 104              | 0                                                | NA               | NA      | NA      |
| simul 36   | 106              | 0                                                | NA               | NA      | NA      |
| simul 37   | 113              | 0                                                | NA               | NA      | NA      |
| simul 38   | 108              | 0                                                | NA               | NA      | NA      |
| simul 39   | 110              | 1                                                | 6.60E-03         | 13      | 22      |
| simul 40   | 113              | 1                                                | 8.60E-04         | 38      | 50      |
| simul 41   | 109              | 1                                                | 1.05E-03         | 12      | 22      |
| simul 42   | 116              | 0                                                | NA               | NA      | NA      |
| simul 43   | 111              | 0                                                | NA               | NA      | NA      |
| simul 44   | 102              | 2                                                | 1.41E-03         | 12      | 30      |
| simul 45   | 112              | 0                                                | NA               | NA      | NA      |
| simul 46   | 100              | 0                                                | NA               | NA      | NA      |
| simul 47   | 110              | 0                                                | NA               | NA      | NA      |
| simul 48   | 101              | 0                                                | NA               | NA      | NA      |
| simul 49   | 116              | 0                                                | NA               | NA      | NA      |
| simul 50   | 106              | 0                                                | NA               | NA      | NA      |
| simul 51   | 119              | 0                                                | NA               | NA      | NA      |
| simul 52   | 109              | 0                                                | NA               | NA      | NA      |
| simul 53   | 106              | 2                                                | 4.50E-03         | 40      | 51      |
| simul 54   | 109              | 1                                                | 2.68E-03         | 9       | 15      |
| simul 55   | 101              | 0                                                | NA               | NA      | NA      |

|           |     |   |          |    |    |
|-----------|-----|---|----------|----|----|
| simul 56  | 117 | 0 | NA       | NA | NA |
| simul 57  | 101 | 1 | 3.32E-05 | 15 | 29 |
| simul 58  | 110 | 0 | NA       | NA | NA |
| simul 59  | 99  | 0 | NA       | NA | NA |
| simul 60  | 105 | 2 | 2.99E-05 | 12 | 25 |
| simul 61  | 102 | 2 | 2.35E-04 | 36 | 49 |
| simul 62  | 111 | 3 | 3.47E-03 | 19 | 32 |
| simul 63  | 100 | 0 | NA       | NA | NA |
| simul 64  | 94  | 1 | 4.25E-04 | 10 | 17 |
| simul 65  | 106 | 1 | 6.12E-04 | 12 | 19 |
| simul 66  | 108 | 0 | NA       | NA | NA |
| simul 67  | 105 | 0 | NA       | NA | NA |
| simul 68  | 114 | 1 | 1.65E-03 | 7  | 12 |
| simul 69  | 103 | 1 | 6.70E-04 | 25 | 38 |
| simul 70  | 102 | 1 | 4.95E-04 | 4  | 9  |
| simul 71  | 117 | 0 | NA       | NA | NA |
| simul 72  | 97  | 1 | 6.20E-03 | 6  | 15 |
| simul 73  | 118 | 1 | 5.02E-03 | 7  | 12 |
| simul 74  | 98  | 0 | NA       | NA | NA |
| simul 75  | 115 | 1 | 5.67E-03 | 5  | 8  |
| simul 76  | 95  | 0 | NA       | NA | NA |
| simul 77  | 113 | 0 | NA       | NA | NA |
| simul 78  | 112 | 1 | 6.44E-03 | 6  | 9  |
| simul 79  | 110 | 0 | NA       | NA | NA |
| simul 80  | 114 | 0 | NA       | NA | NA |
| simul 81  | 114 | 0 | NA       | NA | NA |
| simul 82  | 104 | 1 | 7.44E-03 | 12 | 18 |
| simul 83  | 113 | 1 | 6.83E-03 | 22 | 27 |
| simul 84  | 106 | 0 | NA       | NA | NA |
| simul 85  | 112 | 0 | NA       | NA | NA |
| simul 86  | 100 | 0 | NA       | NA | NA |
| simul 87  | 108 | 2 | 4.83E-03 | 46 | 54 |
| simul 88  | 110 | 1 | 3.82E-03 | 4  | 7  |
| simul 89  | 106 | 0 | NA       | NA | NA |
| simul 90  | 116 | 2 | 2.07E-04 | 5  | 8  |
| simul 91  | 102 | 0 | NA       | NA | NA |
| simul 92  | 92  | 0 | NA       | NA | NA |
| simul 93  | 115 | 0 | NA       | NA | NA |
| simul 94  | 101 | 0 | NA       | NA | NA |
| simul 95  | 101 | 1 | 7.42E-04 | 7  | 14 |
| simul 96  | 100 | 0 | NA       | NA | NA |
| simul 97  | 103 | 0 | NA       | NA | NA |
| simul 98  | 107 | 0 | NA       | NA | NA |
| simul 99  | 109 | 0 | NA       | NA | NA |
| simul 100 | 98  | 1 | 4.95E-04 | 4  | 9  |

**Table S3.** Gene clusters generated in the simulation study for the null hypothesis test. We performed the NHC method on 100 randomly sampled individuals with different severe infectious diseases, for 100 times. The number of output gene clusters (after merging the gene clusters from the initial output), the number of significant class-I clusters, and the top-ranked gene clusters are shown.

| Simulation | Simulation on Hippo Pathway |                 | Hippo-Cluster<br>(the gene cluster that is most enriched in Hippo pathway) |         |         |                    |                          |
|------------|-----------------------------|-----------------|----------------------------------------------------------------------------|---------|---------|--------------------|--------------------------|
|            | # Simulated Cases           | # Mutated Genes | Cluster Rank                                                               | # Genes | # Cases | Cluster $p$ -value | Hippo Pathway $p$ -value |
| simul 1    | 5                           | 4               | #1                                                                         | 7       | 17      | 1.93e-05           | 9.74e-13                 |
| simul 2    | 5                           | 4               | #4                                                                         | 7       | 11      | 5.47e-03           | 1.26e-09                 |
| simul 3    | 5                           | 4               | #5                                                                         | 8       | 12      | 2.18e-02           | 3.37e-09                 |
| simul 4    | 5                           | 5               | #8                                                                         | 7       | 10      | 1.40e-02           | 9.74e-13                 |
| simul 5    | 5                           | 4               | #4                                                                         | 7       | 12      | 1.32e-02           | 1.26e-09                 |
| simul 6    | 5                           | 3               | #4                                                                         | 7       | 13      | 7.15e-04           | 9.74e-13                 |
| simul 7    | 5                           | 5               | #1                                                                         | 6       | 11      | 3.87e-03           | 1.40e-13                 |
| simul 8    | 5                           | 5               | #1                                                                         | 9       | 14      | 1.15e-03           | 1.20e-14                 |
| simul 9    | 5                           | 5               | #1                                                                         | 8       | 20      | 8.34e-07           | 2.67e-15                 |
| simul 10   | 5                           | 3               | #4                                                                         | 10      | 15      | 1.64e-03           | 3.99e-14                 |
| simul 11   | 5                           | 4               | #1                                                                         | 7       | 16      | 4.47e-04           | 1.26e-09                 |
| simul 12   | 5                           | 5               | #1                                                                         | 7       | 16      | 4.47e-04           | 9.74e-13                 |
| simul 13   | 5                           | 5               | #1                                                                         | 8       | 16      | 3.88e-05           | 2.67e-15                 |
| simul 14   | 5                           | 5               | #1                                                                         | 9       | 19      | 8.81e-05           | 1.20e-14                 |
| simul 15   | 5                           | 4               | #1                                                                         | 8       | 18      | 9.58e-06           | 2.67e-15                 |
| simul 16   | 5                           | 5               | #1                                                                         | 6       | 19      | 1.65e-07           | 1.40e-13                 |
| simul 17   | 5                           | 4               | #1                                                                         | 8       | 20      | 8.34e-07           | 2.67e-15                 |
| simul 18   | 5                           | 4               | #1                                                                         | 7       | 16      | 2.14e-04           | 9.74e-13                 |
| simul 19   | 5                           | 4               | #1                                                                         | 10      | 27      | 7.62e-09           | 3.99e-14                 |
| simul 20   | 5                           | 4               | #1                                                                         | 9       | 17      | 4.78e-05           | 1.20e-14                 |
| simul 21   | 5                           | 3               | #1                                                                         | 8       | 21      | 6.89e-06           | 3.37e-09                 |
| simul 22   | 5                           | 5               | #1                                                                         | 9       | 17      | 1.09e-04           | 1.20e-14                 |
| simul 23   | 5                           | 3               | #1                                                                         | 10      | 21      | 1.81e-06           | 3.99e-14                 |
| simul 24   | 5                           | 4               | #1                                                                         | 8       | 23      | 4.74e-09           | 2.67e-15                 |
| simul 25   | 5                           | 4               | #1                                                                         | 9       | 23      | 1.07e-06           | 1.16e-11                 |
| simul 26   | 10                          | 8               | #2                                                                         | 10      | 17      | 8.75e-04           | 3.99e-14                 |
| simul 27   | 10                          | 7               | #5                                                                         | 9       | 14      | 1.15e-03           | 1.20e-14                 |
| simul 28   | 10                          | 6               | #1                                                                         | 8       | 21      | 1.33e-07           | 2.67e-15                 |
| simul 29   | 10                          | 5               | #1                                                                         | 6       | 16      | 8.38e-06           | 4.07e-07                 |
| simul 30   | 10                          | 7               | #1                                                                         | 8       | 22      | 6.36e-08           | 2.67e-15                 |
| simul 31   | 10                          | 7               | #1                                                                         | 6       | 17      | 4.15e-06           | 1.40e-13                 |
| simul 32   | 10                          | 6               | #1                                                                         | 9       | 21      | 6.89e-06           | 1.20e-14                 |
| simul 33   | 10                          | 6               | #1                                                                         | 8       | 23      | 4.74e-09           | 2.67e-15                 |
| simul 34   | 10                          | 6               | #1                                                                         | 7       | 25      | 1.33e-10           | 3.34e-16                 |
| simul 35   | 10                          | 8               | #1                                                                         | 10      | 24      | 1.23e-06           | 3.99e-14                 |
| simul 36   | 10                          | 5               | #1                                                                         | 9       | 21      | 4.03e-07           | 1.20e-14                 |
| simul 37   | 10                          | 6               | #1                                                                         | 8       | 26      | 1.29e-10           | 3.89e-12                 |
| simul 38   | 10                          | 6               | #1                                                                         | 11      | 31      | 3.28e-10           | 1.09e-13                 |
| simul 39   | 10                          | 8               | #1                                                                         | 9       | 31      | 3.06e-13           | 1.20e-14                 |
| simul 40   | 10                          | 6               | #1                                                                         | 10      | 31      | 6.14e-11           | 3.99e-14                 |
| simul 41   | 10                          | 5               | #1                                                                         | 9       | 29      | 5.38e-10           | 1.20e-14                 |
| simul 42   | 10                          | 7               | #1                                                                         | 9       | 36      | 2.14e-14           | 1.20e-14                 |
| simul 43   | 10                          | 6               | #1                                                                         | 10      | 38      | 1.93e-17           | 3.99e-14                 |
| simul 44   | 10                          | 6               | #1                                                                         | 10      | 29      | 1.61e-09           | 3.99e-14                 |
| simul 45   | 10                          | 6               | #1                                                                         | 9       | 36      | 2.14e-14           | 1.20e-14                 |
| simul 46   | 10                          | 6               | #1                                                                         | 7       | 30      | 5.94e-14           | 3.34e-16                 |
| simul 47   | 10                          | 6               | #1                                                                         | 9       | 39      | 6.16e-19           | 1.20e-14                 |
| simul 48   | 10                          | 7               | #1                                                                         | 9       | 46      | 1.29e-21           | 1.20e-14                 |
| simul 49   | 10                          | 6               | #1                                                                         | 8       | 33      | 5.93e-15           | 2.67e-15                 |
| simul 50   | 10                          | 6               | #1                                                                         | 8       | 38      | 1.39e-18           | 2.67e-15                 |
| simul 51   | 20                          | 8               | #1                                                                         | 8       | 21      | 7.31e-08           | 2.67e-15                 |
| simul 52   | 20                          | 8               | #1                                                                         | 10      | 26      | 4.52e-08           | 3.99e-14                 |

|           |    |   |    |    |    |          |          |
|-----------|----|---|----|----|----|----------|----------|
| simul 53  | 20 | 7 | #1 | 8  | 24 | 1.15e-09 | 2.67e-15 |
| simul 54  | 20 | 8 | #1 | 10 | 26 | 4.52e-08 | 3.99e-14 |
| simul 55  | 20 | 6 | #1 | 6  | 24 | 2.46e-11 | 1.40e-13 |
| simul 56  | 20 | 7 | #1 | 10 | 30 | 2.43e-10 | 3.99e-14 |
| simul 57  | 20 | 8 | #1 | 9  | 29 | 3.04e-10 | 1.20e-14 |
| simul 58  | 20 | 7 | #1 | 9  | 29 | 6.38e-12 | 1.20e-14 |
| simul 59  | 20 | 7 | #1 | 10 | 37 | 1.02e-16 | 3.99e-14 |
| simul 60  | 20 | 7 | #1 | 8  | 33 | 1.07e-15 | 2.67e-15 |
| simul 61  | 20 | 8 | #1 | 9  | 38 | 9.37e-16 | 1.20e-14 |
| simul 62  | 20 | 7 | #1 | 9  | 37 | 1.89e-17 | 1.20e-14 |
| simul 63  | 20 | 6 | #1 | 7  | 37 | 4.48e-19 | 3.34e-16 |
| simul 64  | 20 | 7 | #1 | 9  | 37 | 1.89e-17 | 1.20e-14 |
| simul 65  | 20 | 8 | #1 | 9  | 45 | 4.41e-24 | 1.20e-14 |
| simul 66  | 20 | 8 | #1 | 9  | 41 | 7.13e-18 | 1.20e-14 |
| simul 67  | 20 | 8 | #1 | 10 | 43 | 5.39e-19 | 3.99e-14 |
| simul 68  | 20 | 8 | #1 | 8  | 49 | 1.92e-27 | 2.67e-15 |
| simul 69  | 20 | 8 | #1 | 9  | 51 | 1.07e-28 | 1.20e-14 |
| simul 70  | 20 | 7 | #1 | 10 | 51 | 9.23e-28 | 3.99e-14 |
| simul 71  | 20 | 8 | #1 | 9  | 42 | 1.34e-18 | 1.20e-14 |
| simul 72  | 20 | 8 | #1 | 9  | 50 | 2.61e-28 | 1.20e-14 |
| simul 73  | 20 | 8 | #1 | 9  | 48 | 1.15e-25 | 1.20e-14 |
| simul 74  | 20 | 6 | #1 | 11 | 54 | 5.95e-27 | 1.09e-13 |
| simul 75  | 20 | 7 | #1 | 7  | 46 | 2.33e-26 | 3.34e-16 |
| simul 76  | 30 | 8 | #1 | 8  | 29 | 9.13e-11 | 2.67e-15 |
| simul 77  | 30 | 8 | #1 | 9  | 34 | 2.68e-15 | 1.20e-14 |
| simul 78  | 30 | 8 | #1 | 10 | 33 | 1.93e-12 | 3.99e-14 |
| simul 79  | 30 | 8 | #1 | 10 | 36 | 2.14e-14 | 3.99e-14 |
| simul 80  | 30 | 8 | #1 | 7  | 35 | 1.46e-17 | 3.34e-16 |
| simul 81  | 30 | 8 | #1 | 9  | 46 | 1.87e-24 | 1.20e-14 |
| simul 82  | 30 | 8 | #1 | 7  | 40 | 2.04e-21 | 3.34e-16 |
| simul 83  | 30 | 8 | #1 | 9  | 39 | 3.58e-18 | 1.20e-14 |
| simul 84  | 30 | 8 | #1 | 8  | 48 | 1.44e-27 | 2.67e-15 |
| simul 85  | 30 | 8 | #1 | 8  | 46 | 6.59e-25 | 2.67e-15 |
| simul 86  | 30 | 8 | #1 | 9  | 44 | 4.35e-20 | 1.20e-14 |
| simul 87  | 30 | 7 | #1 | 9  | 47 | 3.62e-23 | 1.20e-14 |
| simul 88  | 30 | 8 | #1 | 9  | 53 | 2.62e-27 | 1.20e-14 |
| simul 89  | 30 | 8 | #1 | 9  | 57 | 1.07e-31 | 1.20e-14 |
| simul 90  | 30 | 8 | #1 | 9  | 51 | 1.07e-28 | 1.20e-14 |
| simul 91  | 30 | 8 | #1 | 9  | 56 | 1.07e-32 | 1.20e-14 |
| simul 92  | 30 | 8 | #1 | 7  | 58 | 2.59e-37 | 3.34e-16 |
| simul 93  | 30 | 8 | #1 | 8  | 63 | 1.51e-40 | 2.67e-15 |
| simul 94  | 30 | 7 | #1 | 10 | 59 | 3.53e-32 | 3.99e-14 |
| simul 95  | 30 | 8 | #1 | 9  | 66 | 4.51e-43 | 1.20e-14 |
| simul 96  | 30 | 7 | #1 | 9  | 58 | 4.42e-35 | 1.20e-14 |
| simul 97  | 30 | 7 | #1 | 10 | 66 | 2.25e-39 | 3.99e-14 |
| simul 98  | 30 | 8 | #1 | 8  | 64 | 1.43e-41 | 2.67e-15 |
| simul 99  | 30 | 8 | #1 | 7  | 67 | 1.40e-46 | 3.34e-16 |
| simul 100 | 30 | 8 | #1 | 9  | 72 | 9.24e-47 | 1.20e-14 |

**Table S4.** Identification of the Hippo-cluster in simulation study II for the detection of simulated disease signals. We performed the NHC method on 100 random cases, in which a random subgroup of 5, 10, 20, or 30 cases was randomly assigned any of the eight simulated mutations of genes from the Hippo pathway. We identified the gene clusters most enriched in the Hippo pathway.

| Rank | Enriched Pathway                                                | Pathway <i>p</i> -value |
|------|-----------------------------------------------------------------|-------------------------|
| 1    | KEGG_TOLL_LIKE_RECEPTOR_SIGNALING_PATHWAY                       | 3.21e-15                |
| 2    | REACTOME_TOLL_LIKE_RECEPTOR_CASCADES                            | 8.88e-15                |
| 3    | REACTOME_INNATE_IMMUNE_SYSTEM                                   | 1.85e-13                |
| 4    | REACTOME_TICAM1_DEPENDENT_ACTIVATION_OF_IRF3_IRF7               | 3.40e-13                |
| 5    | REACTOME_DDX58_IFIH1_MEDIATED_INDUCION_OF_INTERFERON_ALPHA_BETA | 7.47e-13                |
| 6    | REACTOME_TOLL_LIKE_RECEPTOR_4_TLR4_CASCADE                      | 2.35e-12                |
| 7    | REACTOME_ACTIVATION_OF_IRF3_IRF7_MEDIATED_BY_TBK1_IKK_EPSILON   | 2.89e-12                |
| 8    | REACTOME_NEGATIVE_REGULATORS_OF_DDX58_IFIH1_SIGNALING           | 3.11e-12                |
| 9    | REACTOME_MYD88_INDEPENDENT_TLR4_CASCADE                         | 6.83e-12                |
| 10   | REACTOME_CYTOKINE_SIGNALING_IN_IMMUNE_SYSTEM                    | 8.39e-12                |
| 11   | REACTOME_TRAF3_DEPENDENT_IRF_ACTIVATION_PATHWAY                 | 1.41e-10                |
| 12   | KEGG_RIG_I_LIKE_RECEPTOR_SIGNALING_PATHWAY                      | 1.20e-09                |
| 13   | REACTOME_TRAF6_MEDIATED_IRF7_ACTIVATION                         | 9.84e-09                |
| 14   | REACTOME_DISEASES_OF_IMMUNE_SYSTEM                              | 3.07e-07                |
| 15   | KEGG_CYTOSOLIC_DNA_SENSING_PATHWAY                              | 5.51e-07                |
| 16   | KEGG_NOD_LIKE_RECEPTOR_SIGNALING_PATHWAY                        | 1.19e-06                |
| 17   | REACTOME_INTERFERON_SIGNALING                                   | 7.78e-06                |

**Table S5.** The significantly enriched pathways of the top-ranked gene cluster from the HSE cohort.

| Cluster                                                                                                | # Genes | # Variants<br>Hom   Het | # Cases | Cluster<br><i>p</i> -value | Most Enriched Pathway ( <i>p</i> -value)                             |
|--------------------------------------------------------------------------------------------------------|---------|-------------------------|---------|----------------------------|----------------------------------------------------------------------|
| <b>Class-I</b>                                                                                         |         |                         |         |                            |                                                                      |
| #1                                                                                                     | 27      | 0   42                  | 37      | 0.00176                    | KEGG_TOLL_LIKE_RECEPTOR_SIGNALING_PATHWAY (6.73e-14)                 |
| #2                                                                                                     | 5       | 0   13                  | 12      | 0.00261                    | REACTOME_HDR_THROUGH_SINGLE_STRAND_ANNEALING_SSA (9.676e-10)         |
| #3                                                                                                     | 6       | 0   14                  | 14      | 0.00445                    | REACTOME_PEROXISOMAL_PROTEIN_IMPORT (7.262e-11)                      |
| #4                                                                                                     | 15      | 0   28                  | 26      | 0.00841                    | REACTOME_RETROGRADE_TRANSPORT_AT_THE_TRANS_GOLGI_NETWORK (1.106e-14) |
| <b>Class-II</b>                                                                                        |         |                         |         |                            |                                                                      |
| #5                                                                                                     | 30      | 0   46                  | 41      | 0.00041                    | REACTOME_MITOCHONDRIAL_TRANSLATION (1.121e-57)                       |
| #6                                                                                                     | 9       | 0   22                  | 20      | 0.00199                    | REACTOME_PROCESSING_OF_INTRONLESS_PRE_MRNAS (8.875e-15)              |
| This class-I cluster is just above the cluster-level significance cutoff, but functionally interesting |         |                         |         |                            |                                                                      |
| #7                                                                                                     | 6       | 0   26                  | 24      | 0.01023                    | KEGG_REGULATION_OF_AUTOPHAGY (3.144e-06)                             |

**Table S6.** The six significant gene clusters ( $p$ -value  $\leq 0.01$ ) detected by NHC in the HSE cohort of 109 cases of unknown disease etiology, and one gene cluster with a  $p$ -value of 0.01023, just above the cutoff, but nevertheless functionally interesting.

| Rank | Pathway                                              | # Genes | Gene List                                                                                                                                                                        | <i>p</i> -value |
|------|------------------------------------------------------|---------|----------------------------------------------------------------------------------------------------------------------------------------------------------------------------------|-----------------|
| 1    | REACTOME_TRAFFICKING_AND_PROCESSING_OF_ENDOSOMAL_TLR | 13      | CNPY3, CTSB, CTSK, CTSL, CTSS, CTSV, HSP90B1, LGMN, <u>TLR3</u> , TLR7, TLR8, TLR9, <u>UNC93B1</u>                                                                               | 0.000247        |
| 2    | REACTOME_TICAM1_DEPENDENT_ACTIVATION_OF_IRF3_IRF7    | 13      | <u>IKBKE</u> , <u>IRF3</u> , IRF7, RPS27A, <u>TANK</u> , <u>TBK1</u> , <u>TICAM1</u> , <u>TLR3</u> , <u>TRAF3</u> , UBA52, UBB, UBC                                              | 0.000635        |
| 3    | REACTOME_ZBP1_DAI_MEDIATED_INDUCTION_OF_TYPE_I_IFNS  | 21      | CHUK, DHX9, DTX4, IKBKB, IKBKG, <u>IRF3</u> , MYD88, NFKB1, NFKB2, NFKBIA, NFKBIB, NKIRAS1, NKIRAS2, NLRP4, RELA, RIPK1, RIPK3, <u>TBK1</u> , <u>TICAM1</u> , <u>TLR3</u> , ZBP1 | 0.000691        |
| 4    | KEGG_RIBOFLAVIN_METABOLISM                           | 16      | ACP1, ACP2, ACP3, ACP4, ACP5, ACP6, ENPP1, ENPP3, FLAD1, MTMR1, MTMR2, MTMR6, MTMR7, PHPT1, RFK, TYR                                                                             | 0.000854        |
| 5    | REACTOME_CROSSLINKING_OF_COLLAGEN_FIBRILS            | 18      | BMP1, COL1A1, COL1A2, COL4A1, COL4A2, COL4A3, COL4A4, COL4A5, COL4A6, LOX, LOXL1, LOXL2, LOXL3, LOXL4, PCOLCE, PXDN, TLL1, TLL2                                                  | 0.000992        |

**Table S7.** The significant pathways ( $p$ -value < 0.001) identified by running our own scripted pathway-informed SKAT-O test on the HSE cohort. The genes in the list underlined with a solid line are the genes harboring the known HSE-causing mutations, and those underlined with a wavy line are the candidate genes that we selected from the top-ranked NHC gene cluster.



| Cluster         | #Genes | #Var<br>Hom   Het | #Cases | Cluster<br><i>p</i> -value | #Pathways | Top Pathway                                                  | #BP | Top BP                                                                         | #MF | Top MF                                                    |
|-----------------|--------|-------------------|--------|----------------------------|-----------|--------------------------------------------------------------|-----|--------------------------------------------------------------------------------|-----|-----------------------------------------------------------|
| <b>Class-I</b>  |        |                   |        |                            |           |                                                              |     |                                                                                |     |                                                           |
| #1              | 28     | 4   55            | 49     | 3.12e-05                   | 16        | KEGG_TOLL_LIKE_RECEPTOR_SIGNALING_PATHWAY (3.594e-16)        | 11  | GO:0035666:TRIF-dependent toll-like receptor signaling pathway (1.029e-16)     | 0   | .                                                         |
| #2              | 5      | 0   14            | 13     | 0.00274                    | 11        | REACTOME_HDR_THROUGH_SINGLE_STRAND_ANNEALING_SSA (9.676e-10) | 4   | GO:1901796:regulation of signal transduction by p53 class mediator (2.108e-07) | 0   | .                                                         |
| #3              | 6      | 0   15            | 15     | 0.00564                    | 3         | REACTOME_PEROXISOMAL_PROTEIN_IMPORT (7.262e-11)              | 2   | GO:0006625:protein targeting to peroxisome (2.81e-11)                          | 0   | .                                                         |
| <b>Class-II</b> |        |                   |        |                            |           |                                                              |     |                                                                                |     |                                                           |
| #4              | 26     | 1   44            | 44     | 6.44e-05                   | 2         | REACTOME_MITOCHONDRIAL_TRANSLATION (7.58e-50)                | 4   | GO:0070125:mitochondrial translational elongation (4.128e-55)                  | 2   | GO:0003735:structural constituent of ribosome (1.993e-34) |
| #5              | 9      | 0   23            | 22     | 0.00143                    | 6         | REACTOME_PROCESSING_OF_INTRONLESS_PREMRNAS (5.327e-18)       | 6   | GO:0006378:mRNA polyadenylation (4.458e-17)                                    | 0   | .                                                         |

**Table S8:** NHC-boost detected the same number of significant gene clusters in the HSE cohort of 122 individuals, but with slightly fewer genes in clusters #1, #4 and #5 (see Table 2 for comparison), in a significantly shorter computation time: 5 minutes, versus 40 minutes for the original NHC code.
